1 **Impaired performance of SARS-CoV-2 antigen-detecting rapid tests at elevated**  
2 **temperatures**

3 Verena Haage<sup>1</sup>, Edmilson Ferreira de Oliveira-Filho<sup>1</sup>, Andres Moreira-Soto<sup>1</sup>, Arne  
4 Kühne<sup>1</sup>, Carlo Fischer<sup>1</sup>, Jilian Sacks<sup>3</sup>, Victor Max Corman<sup>1,2</sup>, Marcel A. Müller<sup>1,2</sup>,  
5 Christian Drosten<sup>1,2</sup>, Jan Felix Drexler<sup>1,2\*</sup>

6 <sup>1</sup>Institute of Virology, Charité-Universitätsmedizin Berlin, Corporate Member of Freie  
7 Universität Berlin, Humboldt-Universität zu Berlin, and Berlin Institute of Health, Berlin,  
8 Germany

9 <sup>2</sup>German Centre for Infection Research (DZIF), Associated Partner Charité-  
10 Universitätsmedizin Berlin, Berlin, Germany

11  
12 \*Correspondence: Jan Felix Drexler, Helmut-Ruska-Haus, Institute of Virology, Campus  
13 Charité Mitte, Charitéplatz 1, 10098 Berlin, Germany; Email: felix.drexler@charite.de

14  
15  
16 **Key words:** SARS-CoV-2, rapid antigen test, temperature stability, tropics, diagnostics

17

18

19

20

21

## 22 **Abstract**

23 Rapid antigen-detecting tests (Ag-RDTs) can complement molecular diagnostics for  
24 COVID-19. The recommended temperature for storage of SARS-CoV-2 Ag-RDTs ranges  
25 between 5-30°C. In many countries that would benefit from SARS-CoV-2 Ag-RDTs, mean  
26 temperatures exceed 30°C. We assessed analytical sensitivity and specificity of eleven  
27 commercially available SARS-CoV-2 Ag-RDTs using different storage and operational  
28 temperatures, including (i) long-term storage and testing at recommended conditions, (ii)  
29 recommended storage conditions followed by 10 minutes exposure to 37°C and testing at  
30 37°C and (iii) 3 weeks storage followed by testing at 37°C. The limits of detection of SARS-  
31 CoV-2 Ag-RDTs under recommended conditions ranged from  $8.2 \times 10^5$ - $7.9 \times 10^7$  genome  
32 copies/ml of infectious SARS-CoV-2 cell culture supernatant. Despite long-term storage  
33 at recommended conditions, 10 minutes pre-incubation of Ag-RDTs and testing at 37°C  
34 resulted in about ten-fold reduced sensitivity for 46% of SARS-CoV-2 Ag-RDTs, including  
35 both Ag-RDTs currently listed for emergency use by the World Health Organization. After  
36 3 weeks of storage at 37°C, 73% of SARS-CoV-2 Ag-RDTs exhibited about ten-fold  
37 reduced sensitivity. Specificity of SARS-CoV-2 Ag-RDTs using cell culture-derived human  
38 coronaviruses HCoV-229E and HCoV-OC43 was not affected by storage and testing at  
39 37°C. In summary, short- and long-term exposure to elevated temperatures likely impairs  
40 sensitivity of several SARS-CoV-2 Ag-RDTs that may translate to false-negative test  
41 results at clinically relevant virus concentrations compatible with inter-individual  
42 transmission. Ensuring appropriate transport and storage conditions, and development of  
43 tests that are more robust across temperature fluctuations will be important for accurate  
44 use of SARS-CoV-2 Ag-RDTs in tropical settings.

## 45 **Introduction**

46 Advantages of SARS-CoV-2 antigen-detecting rapid diagnostic tests (Ag-RDTs) include  
47 fast results and their applicability on site without dependence on laboratory settings. Ag-  
48 RDTs are not intended to replace real-time RT-PCR as the gold standard for SARS-CoV-  
49 2 diagnostics (1, 2), but can be deployed for surveillance in high-risk environments or  
50 areas with insufficient laboratory capacity. With a constantly growing number of  
51 commercially available Ag-RDTs on the global market, the number of studies validating  
52 Ag-RDTs from different manufacturers is increasing rapidly (3-9). Those validation studies  
53 have so far not focused on the performance of Ag-RDTs under conditions that differ from  
54 recommended storage and test execution conditions (5-30°C), such as those observed in  
55 tropical settings where ambient temperatures commonly exceed 30°C (**Figure 1A**). This  
56 is challenging because tropical regions are strongly affected by the SARS-CoV-2  
57 pandemic as evident from total cases reported from India, Brazil, Argentina, and  
58 Colombia, four out of the ten most affected countries worldwide by November 2020  
59 (**Figure 1B**).

60 Several studies have shown the need for validation of diagnostic tools in resource-limited  
61 tropical regions because co-endemic diseases can affect diagnostic test performance (10-  
62 14). The same might also apply to the environmental conditions under which Ag-RDTs  
63 are transported, stored and used. Temperature tolerance of SARS-CoV-2 diagnostic tools  
64 or environmental stability requirements have been previously discussed as hurdles and  
65 corresponding guidelines for stability testing of *in vitro* diagnostics are provided by the  
66 World Health Organization (WHO) (15, 16). To date, knowledge about temperature  
67 stability of SARS-CoV-2 Ag-RDTs is scarce.

68 To validate the performance of SARS-CoV-2 Ag-RDT in tropical settings, we compared  
69 analytical sensitivity and specificity of eleven SARS-CoV-2 Ag-RDTs using recommended  
70 and elevated temperatures.

71

## 72 **Materials and Methods**

### 73 **Storage and testing of SARS-CoV-2 Ag-RDTs at 37°C**

74 For storage at recommended conditions, the tests were stored at ambient temperature  
75 and were monitored that the room temperature stayed between 15-25°C. For storage at  
76 37°C, SARS-CoV-2 Ag-RDTs were removed from cartons for space reasons and stored  
77 in plastic bags in a 37°C incubator for 19-21 days for sensitivity and 8-9 days for specificity  
78 testing. All tests were kept in their individual foil packaging until use. For experiments with  
79 infectious SARS-CoV-2, Ag-RDTs were transferred to a BSL-3 laboratory and stored in a  
80 37°C incubator until test application. For specificity testing with infectious human  
81 coronavirus (HCoV)-229E and HCoV-OC43, SARS-CoV-2 Ag-RDTs were transferred to  
82 a BSL-2 laboratory and stored in a 37°C incubator until test validation. For experiments  
83 testing short-term exposure to 37°C following storage at recommended temperatures,  
84 SARS-CoV-2 Ag-RDTs were transferred to a BSL-3 laboratory and stored for 10 minutes  
85 in a 37°C incubator until test operation. After application of SARS-CoV-2, HCoV-229E or  
86 HCoV-OC43 cell culture supernatant in a biological safety cabinet, Ag-RDTs were further  
87 incubated in a 37°C incubator until readout of the results.

88

89

90 **Analytical sensitivity**

91 SARS-CoV-2 (BetaCoV/Munich/ChVir984/2020) was grown on Vero E6 cells (C1008;  
92 African green monkey kidney cells) and maintained in DMEM containing 10% FCS at  
93 37°C with 5% CO<sub>2</sub>. Viral RNA was extracted from cell culture supernatant using the  
94 QIAamp Viral RNA Mini Kit (Qiagen, Hilden, Germany) according to the manufacturer's  
95 instructions. RNA concentration was determined by specific real-time RT-PCR and *in*  
96 *vitro*-transcribed RNA standards designed for absolute quantification of virus  
97 concentrations (17, 18).

98 For determination of the limit of detection (LOD), a SARS-CoV-2 stock ( $3.1 \times 10^9$  copies/ml)  
99 was serially diluted in plain DMEM and 5µl/dilution were added to the extraction buffer of  
100 the respective kit for validation experiments. For the Coris COVID-19 Ag Respi-Strip test,  
101 5µl of SARS-CoV-2 supernatant was added to 95µl of PBS to reach the required sample  
102 volume of 100µl prior to addition of LY-S buffer to the sample for test validation. Initially,  
103 validation experiments were performed in triplicates for a small subset of tests  
104 (ActivXpress, Genedia, ichroma, JOYSBIO) at recommended conditions (i) with all three  
105 replicates showing the same result (**Supplementary Table 1**). Consequently, validation  
106 experiments for all included tests were subsequently performed in duplicates due to a  
107 limited amount of available tests for all conditions tested. LOD was defined as the lowest  
108 dilution at which both replicates were positive. A dilution factor correction was applied  
109 based on the volume of extraction buffer (range between kits, 100-500µl) provided by  
110 each SARS-CoV-2 Ag-RDT kit.

111

112

### 113 **Analytical specificity**

114 Specificity was tested using cell culture supernatant of HCoV-229E and HCoV-OC43,  
115 grown on CaCo-2 cells. Quantification of viral stocks was performed by RT-PCR using an  
116 in house protocol and photometrically quantified *in vitro*-transcribed RNA standards as  
117 described above. 5µl of stocks were directly used for validation experiments. The required  
118 sample volume of 100µl for the Coris COVID-19 Ag Respi-Strip was reached as described  
119 above. Experiments were performed in duplicates.

120

### 121 **Interpretation of test results**

122 Tests were performed according to the test-specific supplier instructions for use, except  
123 for the sample preparation as noted above. Results in the form of a band on  
124 immunochromatography paper were scored independently by two persons except for the  
125 reader-based tests Bioeasy 2019-nCoV Ag and ichroma - COVID-19 Ag. In case of  
126 discrepancy for visual tests, a third person was consulted to reach a final decision. Results  
127 were defined as unclear when a weak, discontinuous band or smear was observed that  
128 could not be clearly defined as a positive or negative result. In case of test failure indicated  
129 by absence of a visible positive control band, the test procedure was repeated with the  
130 same sample.

131

### 132 **World heat map**

133 Data of maximum temperatures of the hottest month (°C) on country level at the spatial  
134 resolution of 2.5 min were obtained from WorldClim 2 (19). National means were

135 calculated using the exactextractr package in R version 4.0.2. Data on COVID-19 cases  
136 were obtained from Worldmeter (20) and visualized using the GraphPad Prism software.

137

## 138 **Results**

139 At present, there are at least 119 SARS-CoV-2 Ag-RDTs commercially available (21).  
140 Eleven of those SARS-CoV-2 rapid antigen tests were selected for temperature stability  
141 validation based on the availability of clinical performance data (3), and manufacturing by  
142 leading suppliers implying availability on the global market (**Table 1**). Subsequently,  
143 analytical performance of selected SARS-CoV-2 Ag-RDTs was assessed following  
144 storage and application of tests under recommended conditions as well as elevated  
145 temperatures (termed tropical conditions henceforth), using three different experimental  
146 settings.

147

148 **Table 1. Overview of SARS-CoV-2 rapid antigen tests included in the study**

| <b>ID</b>  | <b>Test</b>                                         | <b>Manufacturer</b>                     | <b>Readout</b> | <b>Lot No.</b> |
|------------|-----------------------------------------------------|-----------------------------------------|----------------|----------------|
| <b>I</b>   | Panbio™ COVID-19 Ag Rapid Test                      | Abbott Laboratories                     | Visual         | 41ADF012A      |
| <b>II</b>  | ActivXpress + COVID-19 Antigen Complete Testing Kit | Edinburgh Genetics                      | Visual         | AG20200905     |
| <b>III</b> | Bioeasy 2019-nCoV Ag Fluorescence Rapid Test Kit    | Shenzhen Bioeasy Biotechnology Co., Ltd | Reader         | 2003N406       |
| <b>IV</b>  | Clinitest Rapid COVID-19 Antigen Test               | Siemens Healthineers                    | Visual         | 2010184        |

|             |                                 |                                           |        |                                                        |
|-------------|---------------------------------|-------------------------------------------|--------|--------------------------------------------------------|
| <b>V</b>    | Covid.19 Ag Respi-Strip         | Coris BioConcept                          | Visual | 43871J2008<br>43760I2015                               |
| <b>VI</b>   | COVID-19 Ag                     | Genedia                                   | Visual | 643X2005                                               |
| <b>VII</b>  | ichroma - COVID-19 Ag           | Boditech Med                              | Reader | SRQHA27                                                |
| <b>VIII</b> | COVID-19 Antigen Rapid Test Kit | JOYSBIO (Tianjin) Biotechnology Co., Ltd. | Visual | 2020092409                                             |
| <b>IX</b>   | NowCheck COVID-19 Ag test       | BIONOTE INC.                              | Visual | 1901D002 Code GEN                                      |
| <b>X</b>    | SARS-CoV-2 Rapid Antigen Test   | Roche Diagnostics                         | Visual | QCO3020083<br>QCO390003I/Sub:I-2<br>QCO390011A/Sub:A-2 |
| <b>XI</b>   | STANDARD Q COVID-19 Test        | SD Biosensor, Inc.                        | Visual | QCO3020040A                                            |

149  
150  
151 The first setting was (i) storage at recommended conditions (room temperature (rt); 15-  
152 30°C) for 1-6 months and test incubation at recommended conditions (rt; 15-30°C). The  
153 second setting was (ii) storage at recommended conditions (rt; 15-30°C) for 1-6 months,  
154 10 minutes pre-incubation of tests at 37°C prior to testing and test incubation at 37°C so  
155 as to mimic recommended storage of kits prior to test usage under non air-conditioned  
156 conditions in tropical settings. The third setting was (iii) storage under tropical conditions  
157 (37°C) for 19-21 days followed by test incubation at 37°C to mimic non air-conditioned  
158 storage and test application in tropical settings (**Figure 2**).

159 First, we determined analytical sensitivity at recommended conditions by determining the  
160 limit of detection (LOD) of SARS-CoV-2 Ag-RDTs at room temperature using serial



161 dilutions of SARS-CoV-2 cell culture supernatant (dilution range:  $7.2 \times 10^6$  copies/ml to  
162  $3.1 \times 10^9$  copies/ml; **Table 2**) following storage for 1-6 months at room temperature. Prior  
163 to performing all experiments in duplicates we validated analytical sensitivity for a small  
164 subset of tests at recommended conditions in triplicates, showing that results for  
165 duplicates and triplicates were identical (**Supplementary Table 1**). As extraction buffer  
166 volumes differ between manufacturers and a constant volume of SARS-CoV-2  
167 supernatant was applied for validation experiments, the limit of detection (LOD) for each  
168 Ag-RDT was calculated by correcting for the respective dilution factor. The dilution-factor  
169 corrected limit of detection (LOD) for validated SARS-CoV-2 Ag-RDTs ranged from  
170  $8.2 \times 10^5$  copies/ml to  $7.9 \times 10^7$  copies/ml of SARS-CoV-2 cell culture supernatant (**Table 2**).  
171 Those LODs were consistent with previously published virus concentrations for validation  
172 of Ag-RDTs using clinical samples (3), suggesting robustness of our data. Our data also  
173 highlight profound differences in analytical sensitivity of up to 100-fold for SARS-CoV-2  
174 Ag-RDTs from different manufacturers.

175

176

177

178

179

180

181

182 **Table 2. Analytical Sensitivity of SARS-CoV-2 rapid antigen tests at recommended**  
 183 **storage and test conditions**

| SARS-CoV-2 (copies/ml)                      | I                   | II                  | III                 | IV                  | V                   | VI                  | VII                 | VIII                | IX                  | X                   | XI                  |
|---------------------------------------------|---------------------|---------------------|---------------------|---------------------|---------------------|---------------------|---------------------|---------------------|---------------------|---------------------|---------------------|
| 3.1x10 <sup>9</sup>                         | ++                  | ++                  | ++                  | ++                  | ++                  | ++                  | ++                  | ++                  | ++                  | ++                  | ++                  |
| 7.0x10 <sup>8</sup>                         | ++                  | ++                  | ++                  | ++                  | ?                   | ?                   | ++                  | ++                  | ++                  | ++                  | ++                  |
| 7.0x10 <sup>7</sup>                         | ++                  | ++                  | -                   | +                   | -                   | -                   | ++                  | +                   | ++                  | +                   | ++                  |
| 7.2x10 <sup>6</sup>                         | -                   | -                   | -                   | -                   | -                   | -                   | -                   | -                   | -                   | -                   | -                   |
| <b>Corrected SARS-CoV-2 LOD (copies/ml)</b> | 1.2x10 <sup>6</sup> | 1.4x10 <sup>6</sup> | 7.0x10 <sup>6</sup> | 1.1x10 <sup>6</sup> | 7.9x10 <sup>7</sup> | 4.6x10 <sup>7</sup> | 8.2x10 <sup>5</sup> | 1.4x10 <sup>6</sup> | 1.0x10 <sup>6</sup> | 1.0x10 <sup>6</sup> | 1.0x10 <sup>6</sup> |

184 I: Abbott; II ActivXpress; III Bioeasy; IV Clinitest; V Coris; VI Genedia; VII ichroma; VIII  
 185 JOYSBIO; IX NowCheck; X Roche; XI Standard Q. ++ positive; + weak positive; -  
 186 negative; ? unclear result. LOD: limit of detection.

187  
 188 We then assessed analytical sensitivity of SARS-CoV-2 Ag-RDTs following short- and  
 189 long-term exposure to 37°C (settings (ii) and (iii); **Figure 2**) by determining the level of  
 190 detection (LOD) using identical serial dilutions of SARS-CoV-2 cell culture supernatant.  
 191 The analytical sensitivity of about half of the evaluated SARS-CoV-2 Ag-RDTs (five out of  
 192 eleven; 46%) was already compromised by about ten-fold when tests were stored under  
 193 recommended conditions but exposed to 37°C for only ten minutes prior to testing at 37°C  
 194 (**Figure 3**). After 19-21 days storage at 37°C and testing at 37°C, eight out of the eleven  
 195 SARS-CoV-2 Ag-RDTs (73%) showed an about ten-fold reduction in analytical sensitivity  
 196 when compared to recommended temperatures.

197 Additionally, analytical specificity of SARS-CoV-2 Ag-RDTs under recommended and  
198 under tropical storage and test application conditions ((i) and (iii); **Figure 2**) was examined  
199 by testing for cross-reactivity with the ubiquitous HCoV-229E ( $2.9 \times 10^7$  copies/ml) and  
200 HCoV-OC43 ( $1.0 \times 10^6$  copies/ml) (22, 23). Those HCoV concentrations were selected  
201 according to the guidelines on analytical specificity testing for SARS-CoV-2 Ag-RDTs  
202 published by the German Federal institute for vaccines and biomedicines (24). SARS-  
203 CoV-2 Ag-RDTs showed no cross-reactivity with HCoV-229E or HCoV-OC43 upon  
204 storage and testing at elevated temperatures (**Table 3**).

205  
206 **Table 3. Analytical Specificity of SARS-CoV-2 rapid antigen tests at recommended**  
207 **and tropical storage and test application conditions**

| Condition | Virus     | Cps/ml            | I | II | III | IV | V | VI | VII | VIII | IX | X | XI |
|-----------|-----------|-------------------|---|----|-----|----|---|----|-----|------|----|---|----|
| (i)       | HCoV-229E | $2.9 \times 10^7$ | - | -  | -   | -  | - | -  | -   | -    | -  | - | -  |
| (iii)     |           |                   | - | -  | -   | -  | - | -  | -   | -    | -  | - | -  |
| (i)       | HCoV-OC43 | $1.0 \times 10^6$ | - | -  | -   | -  | - | -  | -   | -    | -  | - | -  |
| (iii)     |           |                   | - | -  | -   | -  | - | -  | -   | -    | -  | - | -  |

208 I: Abbott; II ActivXpress; III Bioeasy; IV Clinitest; V Coris; VI Genedia; VII ichroma; VIII  
209 JOYSBIO; IX NowCheck; X Roche; XI Standard Q.+ positive; - negative. Cps, Genome  
210 copies.

211

212

213

214

## 215 Discussion

216 Our study highlights that even short-term exposure to elevated temperatures may  
217 compromise sensitivity of currently available SARS-CoV-2 Ag-RDTs.

218 Our data are consistent with impaired sensitivity of other Ag-RDTs at elevated  
219 temperatures, including Malaria rapid diagnostic tests (MRDTs). An assessment of five  
220 MRDTs reported a 13% to 53% decline in sensitivity for three MRDTs following 90 days  
221 of storage at 35°C (25). Moreover, an evaluation assessing temperature stability of  
222 dengue NS1 antigen-based RDTs at 35°C showed a gradual decline in test sensitivity for  
223 seven out of eight tested dengue Ag-RDTs after storage for about 20 days at elevated  
224 temperatures (26). Beyond storage, elevated temperatures during shipment can also  
225 affect Ag-RDT performance. Supply chains of MRDTs were studied in Burkina Faso,  
226 Senegal, Ethiopia, the Philippines and Cambodia, demonstrating regular exceeding of  
227 30°C during transport (27, 28). Consequently, the WHO recommends heat stability testing  
228 between 35°C and 40°C for MRDTs (29) and supply and delivery chains to tropical  
229 countries must contain adequate cold chains (30).

230 As discussed by others, temperature stability guidelines for *in vitro* diagnostics exist,  
231 however there are currently no specific guidelines for the validation of Ag-RDTs regarding  
232 temperature stability (31-34). Common validation guidelines including environmental  
233 conditions could be a first step towards globally reliable diagnostics.

234 At the same time, our data imply a huge challenge to tropical countries with regard to  
235 adequate storage of SARS-CoV-2 Ag-RDTs. Besides storage capacity, temperature  
236 control and monitoring of storage facilities is required, especially for long-term storage of  
237 Ag-RDTs. To guarantee temperature-regulated storage, a certain level of infrastructure is

238 required, ideally air-conditioned facilities with temperature monitors and secured power  
239 supply. However, these requirements are not realistic and appropriate concepts for  
240 adequate storage in remote areas without electricity and rudimentary infrastructure will be  
241 required.

242 Our study is limited by focusing on analytical test performance exclusively for reasons of  
243 comparability of test results across the different conditions and based on limited access  
244 to clinical samples. An additional limitation of our study is the use of duplicates for some  
245 tests instead of a higher number of replicates, which was due to the limited availability of  
246 all tests included in the study. Further studies will be required to assess test performance  
247 upon tropical storage and application in tropical conditions using large numbers of clinical  
248 samples. Additionally, not only the effect of elevated temperature but also the effect of  
249 increased humidity on test performance will have to be assessed. Finally, future studies  
250 documenting the impact of decreased temperature on test performance may also be  
251 needed. Despite these limitations, our study presents a robust resource for further  
252 validation studies as a high number of SARS-CoV-2 Ag-RDTs was included. Additionally,  
253 our data on an overall impaired performance of Ag-RDTs at elevated temperatures are  
254 consistent across tests and analytical sensitivity for several tests was identical upon usage  
255 of either duplicates or higher numbers of replicates.

256 In sum, it was shown previously that clinically relevant virus concentrations of about  $10^6$   
257 genome copies per ml suffice for virus isolation and culture and therefore serve as a  
258 correlate for infectivity (35, 36). Our study strongly suggests that short- and long-term  
259 exposure to elevated temperatures may compromise sensitivity of SARS-CoV-2 Ag-RDTs

260 to an extent that may lead to false-negative test results at clinically relevant virus  
261 concentrations, potentially enhancing SARS-CoV-2 spread in tropical settings.

262

## 263 **Funding**

264 This study is based on research funded in part by the Bill & Melinda Gates Foundation  
265 (grant ID INV-005971). The findings and conclusions contained within are those of the  
266 authors and do not necessarily reflect positions or policies of the Bill & Melinda Gates  
267 Foundation. The study was further supported in part by the Foundation for Innovative New  
268 Diagnostics (FIND), including procurement of some test kits.

269

270 **Conflicts of Interest:** The authors declare no conflict of interest.

271

272 **Author Contributions:** V.H.: conceptualization, investigation, validation, formal analysis,  
273 data curation, writing – original draft preparation, visualization. E.F.: methodology,  
274 investigation, validation. A.M.S.: investigation, validation, visualization. A.K.: investigation.  
275 C.F.: visualization, software. J.S.: methodology, resources, writing. V.M.C.: methodology.  
276 C.D.: methodology. J.F.D.: conceptualization, methodology, resources, writing – original  
277 draft preparation, visualization, supervision, project administration, funding acquisition. All  
278 authors have read and agreed to the published version of the manuscript.

279

280

281

282

## 283 References

- 284 1. Jayamohan H, Lambert CJ, Sant HJ, Jafek A, Patel D, Feng H, Beeman M, Mahmood T,  
285 Nze U, Gale BK. 2020. SARS-CoV-2 pandemic: a review of molecular diagnostic tools  
286 including sample collection and commercial response with associated advantages and  
287 limitations. *Analytical and Bioanalytical Chemistry* doi:10.1007/s00216-020-02958-1.
- 288 2. European Centre for Disease Prevention and Control S. 2020. Options for the use of  
289 rapid antigen tests for COVID-19 in the EU/EEA and the UK. Technical Report.
- 290 3. Corman VM, Haage VC, Bleicker T, Schmidt ML, Mühlemann B, Zuchowski M, Jó Lei  
291 WK, Tscheak P, Möncke-Buchner E, Müller MA, Krumbholz A, Drexler JF, Drosten C.  
292 2020. Comparison of seven commercial SARS-CoV-2 rapid Point-of-Care Antigen tests.  
293 medRxiv doi:10.1101/2020.11.12.20230292:2020.11.12.20230292.
- 294 4. Iglói Z, Velzing J, van Beek J, van de Vijver D, Aron G, Ensing R, Benschop K, Han W,  
295 Boelsums T, Koopmans M, Geurtsvankessel C, Molenkamp R. 2020. Clinical evaluation  
296 of the Roche/SD Biosensor rapid antigen test with symptomatic, non-hospitalized  
297 patients in a municipal health service drive-through testing site. medRxiv  
298 doi:10.1101/2020.11.18.20234104:2020.11.18.20234104.
- 299 5. Krüger LJ, Gaeddert M, Köppel L, Brümmer LE, Gottschalk C, Miranda IB, Schnitzler P,  
300 Kräusslich HG, Lindner AK, Nikolai O, Mockenhaupt FP, Seybold J, Corman VM,  
301 Drosten C, Pollock NR, Cubas-Atienzar AI, Kontogianni K, Collins A, Wright AH, Knorr B,  
302 Welker A, de Vos M, Sacks JA, Adams ER, Denkinger CM. 2020. Evaluation of the  
303 accuracy, ease of use and limit of detection of novel, rapid, antigen-detecting point-of-  
304 care diagnostics for SARS-CoV-2. medRxiv  
305 doi:10.1101/2020.10.01.20203836:2020.10.01.20203836.
- 306 6. Lindner AK, Nikolai O, Rohardt C, Burock S, Hülso C, Bölke A, Gertler M, Krüger LJ,  
307 Gaeddert M, Tobian F, Lainati F, Seybold J, Jones TC, Hofmann J, Sacks JA,  
308 Mockenhaupt FP, Denkinger CM. 2020. Head-to-head comparison of SARS-CoV-2  
309 antigen-detecting rapid test with professional-collected anterior nasal versus  
310 nasopharyngeal swab. medRxiv  
311 doi:10.1101/2020.12.03.20243725:2020.12.03.20243725.
- 312 7. Lambert-Niclot S, Cuffel A, Le Pape S, Vauloup-Fellous C, Morand-Joubert L, Roque-  
313 Afonso AM, Le Goff J, Delaugerre C. 2020. Evaluation of a Rapid Diagnostic Assay for  
314 Detection of SARS-CoV-2 Antigen in Nasopharyngeal Swabs. *J Clin Microbiol* 58.
- 315 8. Mertens P, De Vos N, Martiny D, Jassoy C, Mirazimi A, Cuypers L, Van den Wijngaert S,  
316 Monteil V, Melin P, Stoffels K, Yin N, Mileto D, Delaunoy S, Magein H, Lagrou K, Bouzet  
317 J, Serrano G, Wautier M, Leclipteux T, Van Ranst M, Vandenberg O, L-US-C-WDG,  
318 Gulbis B, Brancart F, Bry F, Cantinieaux B, Corazza F, Cotton F, Dresselhuis M,  
319 Mahadeb B, Roels O, Vanderlinden J. 2020. Development and Potential Usefulness of  
320 the COVID-19 Ag Respi-Strip Diagnostic Assay in a Pandemic Context. *Frontiers in*  
321 *Medicine* 7.
- 322 9. Mak GC, Cheng PK, Lau SS, Wong KK, Lau CS, Lam ET, Chan RC, Tsang DN. 2020.  
323 Evaluation of rapid antigen test for detection of SARS-CoV-2 virus. *J Clin Virol*  
324 129:104500.
- 325 10. Yadouleton A, Sander AL, Moreira-Soto A, Tchibozo C, Hounkanrin G, Badou Y, Fischer  
326 C, Krause N, Akogbeto P, de Oliveira Filho EF, Dossou A, Brünink S, Aïssi MAJ,  
327 Djingarey MH, Hounkpatin B, Nagel M, Drexler JF. 2021. Limited Specificity of Serologic  
328 Tests for SARS-CoV-2 Antibody Detection, Benin. *Emerg Infect Dis* 27.
- 329 11. Nath H, Mallick A, Roy S, Sukla S, Basu K, De A, Biswas S. 2020. Dengue antibodies  
330 can cross-react with SARS-CoV-2 and vice versa-Antibody detection kits can give false-  
331 positive results for both viruses in regions where both COVID-19 and Dengue co-exist.  
332 medRxiv doi:10.1101/2020.07.03.20145797:2020.07.03.20145797.

- 333 12. Lustig Y, Keler S, Kolodny R, Ben-Tal N, Atias-Varon D, Shlush E, Gerlic M, Munitz A,  
334 Doolman R, Asraf K, Shlush LI, Vivante A. 2020. Potential antigenic cross-reactivity  
335 between SARS-CoV-2 and Dengue viruses. *Clinical infectious diseases* : an official  
336 publication of the Infectious Diseases Society of America doi:10.1093/cid/ciaa1207.
- 337 13. Ombelet S, Ronat JB, Walsh T, Yansouni CP, Cox J, Vlieghe E, Martiny D, Semret M,  
338 Vandenberg O, Jacobs J. 2018. Clinical bacteriology in low-resource settings: today's  
339 solutions. *Lancet Infect Dis* 18:e248-e258.
- 340 14. Fischer C, Drosten C, Drexler JF. 2019. The difficulties in obtaining reliable Zika virus  
341 diagnostics. *Lancet Infect Dis* 19:240-241.
- 342 15. Vandenberg O, Martiny D, Rochas O, van Belkum A, Kozlakidis Z. 2020. Considerations  
343 for diagnostic COVID-19 tests. *Nature Reviews Microbiology* doi:10.1038/s41579-020-  
344 00461-z.
- 345 16. Organization WH. 2017. Technical guidance series (TGS) for WHO prequalification –  
346 diagnostic assessment panels for quality assurance and quality control of in vitro  
347 diagnostic medical devices. Technical Guidance vol. 6.
- 348 17. Drexler JF, Kupfer B, Petersen N, Grotto RM, Rodrigues SM, Grywna K, Panning M,  
349 Annan A, Silva GF, Douglas J, Koay ES, Smuts H, Netto EM, Simmonds P, Pardini MI,  
350 Roth WK, Drosten C. 2009. A novel diagnostic target in the hepatitis C virus genome.  
351 *PLoS Med* 6:e31.
- 352 18. Corman VM, Landt O, Kaiser M, Molenkamp R, Meijer A, Chu DK, Bleicker T, Brünink S,  
353 Schneider J, Schmidt ML, Mulders DG, Haagmans BL, van der Veer B, van den Brink S,  
354 Wijsman L, Goderski G, Romette JL, Ellis J, Zambon M, Peiris M, Goossens H, Reusken  
355 C, Koopmans MP, Drosten C. 2020. Detection of 2019 novel coronavirus (2019-nCoV)  
356 by real-time RT-PCR. *Euro Surveill* 25.
- 357 19. <http://www.worldclim.com/version2>. Accessed 25.11.2020.
- 358 20. <https://www.worldometers.info/coronavirus/#countries>. Accessed 25.11.2020.
- 359 21. <https://www.finddx.org/covid-19/pipeline>. Accessed 23.12.2020.
- 360 22. Annan A, Ebach F, Corman VM, Krumkamp R, Adu-Sarkodie Y, Eis-Hübinger AM,  
361 Kruppa T, Simon A, May J, Evans J, Panning M, Drosten C, Drexler JF. 2016. Similar  
362 virus spectra and seasonality in paediatric patients with acute respiratory disease, Ghana  
363 and Germany. *Clin Microbiol Infect* 22:340-346.
- 364 23. Góes LGB, Zerbinati RM, Tateno AF, de Souza AV, Ebach F, Corman VM, Moreira-Filho  
365 CA, Durigon EL, da Silva Filho L, Drexler JF. 2020. Typical epidemiology of respiratory  
366 virus infections in a Brazilian slum. *J Med Virol* 92:1316-1321.
- 367 24. Arzneimittel Bflub. 2020. Mindestkriterien für SARS-CoV-2 Antigentests im Sinne  
368 von § 1 Abs. 1 Satz 1 TestVO: Antigenschnelltests.
- 369 25. Chiodini PL, Bowers K, Jorgensen P, Barnwell JW, Grady KK, Luchavez J, Moody AH,  
370 Cenizal A, Bell D. 2007. The heat stability of Plasmodium lactate dehydrogenase-based  
371 and histidine-rich protein 2-based malaria rapid diagnostic tests. *Trans R Soc Trop Med*  
372 *Hyg* 101:331-7.
- 373 26. Blacksell SD, Newton PN, Bell D, Kelley J, Mammen MP, Jr., Vaughn DW, Wuthiekanun  
374 V, Sungkakum A, Nisalak A, Day NPJ. 2006. The Comparative Accuracy of 8  
375 Commercial Rapid Immunochromatographic Assays for the Diagnosis of Acute Dengue  
376 Virus Infection. *Clinical Infectious Diseases* 42:1127-1134.
- 377 27. Albertini A, Lee E, Coulibaly SO, Sleshi M, Faye B, Mationg ML, Ouedraogo K, Tsadik  
378 AG, Feleke SM, Diallo I, Gaye O, Luchavez J, Bennett J, Bell D. 2012. Malaria rapid  
379 diagnostic test transport and storage conditions in Burkina Faso, Senegal, Ethiopia and  
380 the Philippines. *Malar J* 11:406.
- 381 28. Jorgensen P, Chanthap L, Rebuena A, Tsuyuoka R, Bell D. 2006. Malaria rapid  
382 diagnostic tests in tropical climates: the need for a cool chain. *Am J Trop Med Hyg*  
383 74:750-4.



- 384 29. World Health Organization FfIND, Center for Disease Control and Prevention. 2014.  
385 Malaria rapid diagnostic test performance. Results of WHO product testing of malaria  
386 RDTs, Round 5 2014.
- 387 30. Organization WH. 2004. The Use of Malaria Rapid Diagnostic Tests. Manila: World  
388 Health Organization.
- 389 31. Phommasone K, Sengvilaipaseuth O, de Lamballerie X, Vongsouvath M, Phonemixay O,  
390 Blacksell SD, Newton PN, Dubot-Pérès A. 2015. Temperature and the field stability of a  
391 dengue rapid diagnostic test in the tropics. *Am J Trop Med Hyg* 93:33-39.
- 392 32. Wayne P. 2009. Evaluation of Stability of In Vitro Diagnostic Reagents; Approved  
393 Guidelines. Clinical and Laboratory Standards Institute EP25-A.
- 394 33. Defense USDo. 2008. Environmental Engineering Considerations and Laboratory Tests.  
395 MIL-STD-810G.
- 396 34. Banoo S, Bell D, Bossuyt P, Herring A, Mabey D, Poole F, Smith PG, Sriram N,  
397 Wongsrichanalai C, Linke R, O'Brien R, Perkins M, Cunningham J, Matsoso P,  
398 Nathanson CM, Olliaro P, Peeling RW, Ramsay A. 2006. Evaluation of diagnostic tests  
399 for infectious diseases: general principles. *Nat Rev Microbiol* 4:S21-31.
- 400 35. Wolfel R, Corman VM, Guggemos W, Seilmaier M, Zange S, Muller MA, Niemeyer D,  
401 Jones TC, Vollmar P, Rothe C, Hoelscher M, Bleicker T, Brunink S, Schneider J,  
402 Ehmann R, Zwirgmaier K, Drosten C, Wendtner C. 2020. Virological assessment of  
403 hospitalized patients with COVID-2019. *Nature* 581:465-469.
- 404 36. Cevik M, Tate M, Lloyd O, Maraolo AE, Schafers J, Ho A. SARS-CoV-2, SARS-CoV, and  
405 MERS-CoV viral load dynamics, duration of viral shedding, and infectiousness: a  
406 systematic review and meta-analysis. *The Lancet Microbe* doi:10.1016/S2666-  
407 5247(20)30172-5.

408

409

410

411

412

413

414

415

416

417

418

419

420

421

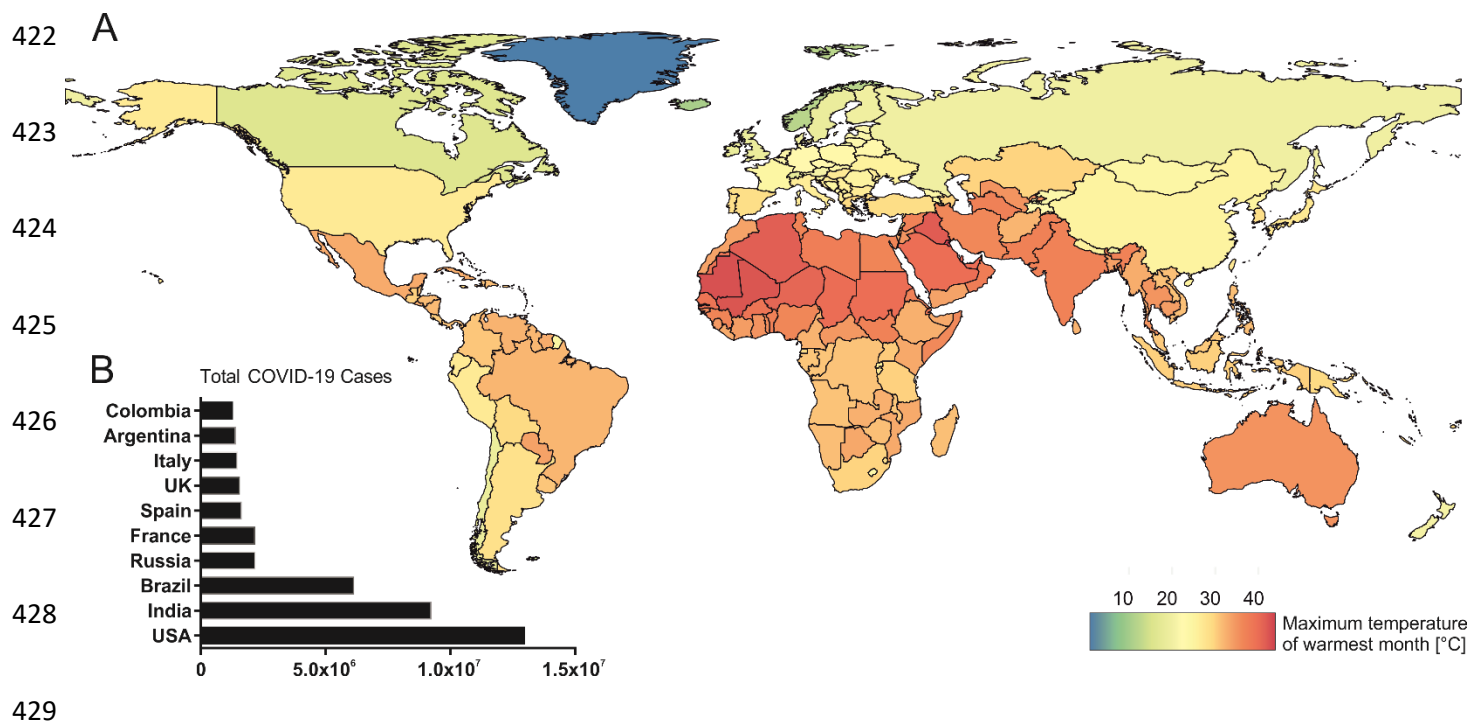

430 **Figure 1. COVID-19 case numbers and mean temperatures globally.** A. World map  
431 representing global temperature distribution based on maximum temperature of the  
432 warmest month (°C) freely available from WorldClim 2 (19). B. Graph represents total  
433 COVID-19 cases in the ten most affected countries globally by 25<sup>th</sup> of November 2020  
434 (20).

435

436

437

438

439

440

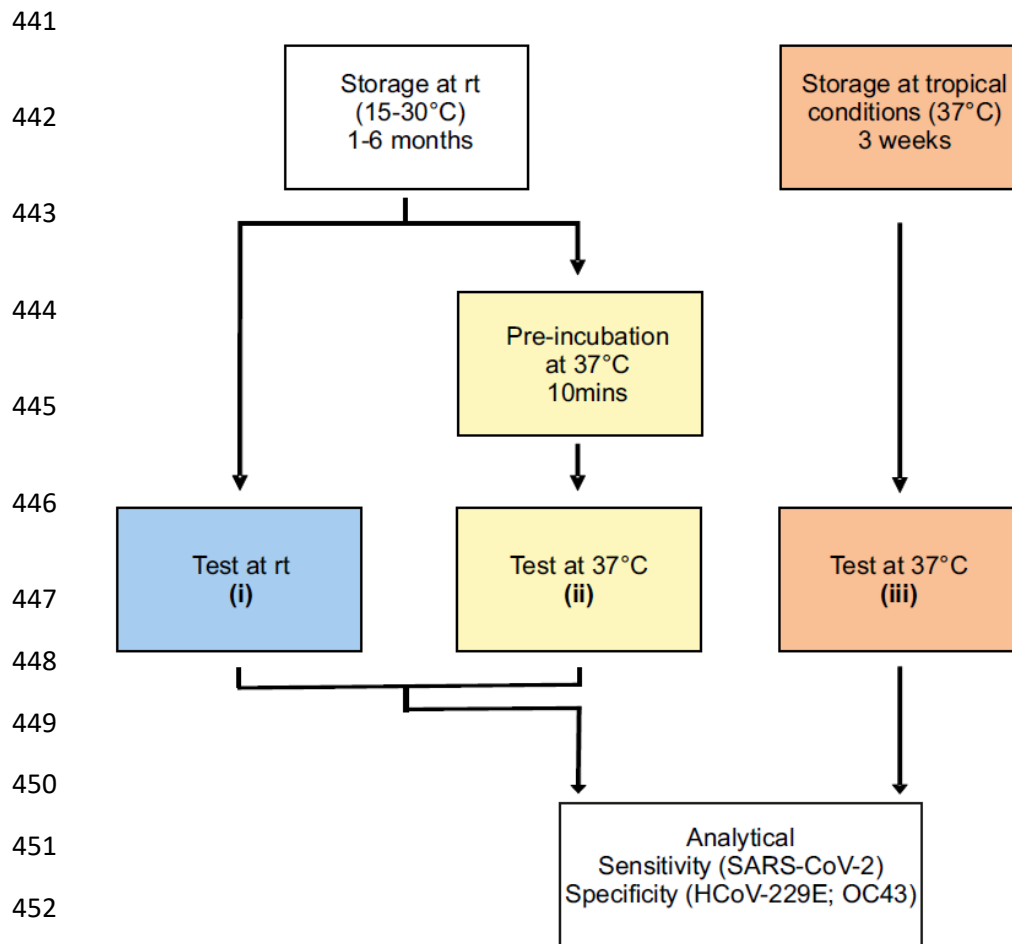

455 **Figure 2. Experimental setup for validation of SARS-CoV-2 Ag-RDTs.** (i): storage and  
456 operation at recommended conditions; (ii): recommended storage and operation at  
457 tropical conditions; (iii): storage and operation at tropical conditions.

458  
459  
460  
461  
462  
463  
464

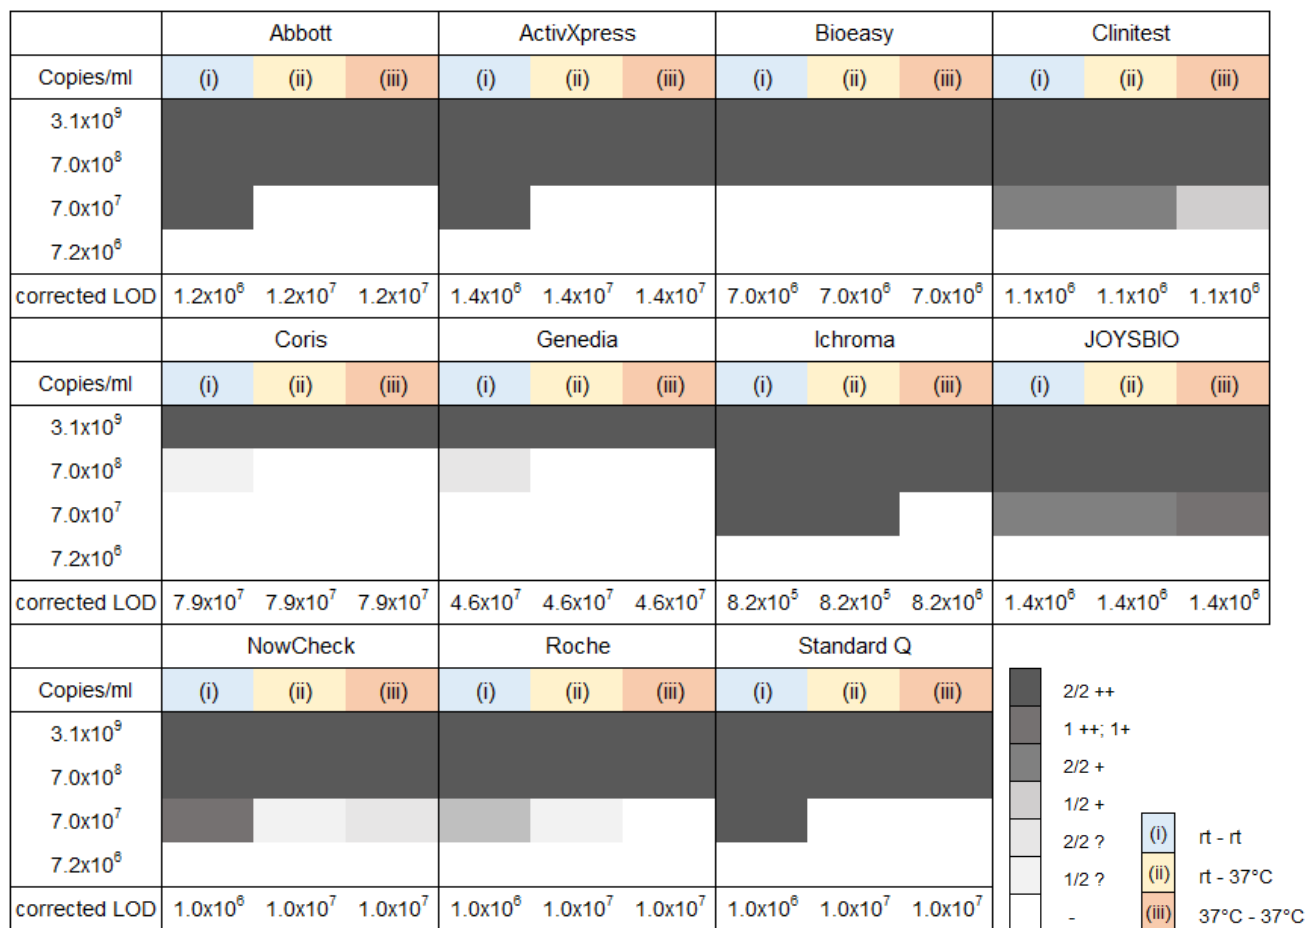

465  
 466 **Figure 3. Sensitivity of SARS-CoV-2 Ag-RDTs decreases at elevated temperatures.**  
 467 Analytical sensitivity of SARS-CoV-2 rapid antigen tests upon different storage and  
 468 operation conditions; (i): rt storage- rt testing, blue; (ii): rt storage - 37°C 10 min pre-  
 469 incubation - 37°C testing, yellow; (iii): 37°C storage - 37°C testing, orange. ++ positive; +  
 470 weak positive; - negative; ? unclear result. 1/2, 2/2: number of replicates. LOD: limit of  
 471 detection. rt: room temperature.

472  
 473  
 474  
 475  
 476

477 **Supplementary Table 1. Analytical Sensitivity of SARS-CoV-2 rapid antigen tests at**  
 478 **recommended storage and test conditions**

| Test                          | ActivXpress |    |    | Genedia |    |    | ichroma |    |    | JOYSBIO |    |    |
|-------------------------------|-------------|----|----|---------|----|----|---------|----|----|---------|----|----|
| Replicate                     | 1           | 2  | 3  | 1       | 2  | 3  | 1       | 2  | 3  | 1       | 2  | 3  |
| <b>SARS-CoV-2 (copies/ml)</b> |             |    |    |         |    |    |         |    |    |         |    |    |
| 3.1x10 <sup>9</sup>           | ++          | ++ | ++ | ++      | ++ | ++ | ++      | ++ | ++ | ++      | ++ | ++ |
| 7.0x10 <sup>8</sup>           | ++          | ++ | ++ | ?       | ?  | ?  | ++      | ++ | ++ | ++      | ++ | ++ |
| 7.0x10 <sup>7</sup>           | ++          | ++ | ++ | -       | -  | -  | ++      | ++ | ++ | +       | +  | +  |
| 7.2x10 <sup>6</sup>           | -           | -  | -  | -       | -  | -  | -       | -  | -  | -       | -  | -  |

479 ++ positive; + weak positive; - negative; ? unclear result. LOD: limit of detection.

480
